# Supplementary material for: Antibiotic resistance and pathogenicity assessment of various Gardnerella sp. strains in local China
Source: PubMed Central journal article supplement (PMC9549249; doi:10.3389/fmicb.2022.1009798), 2022-09-26
Supplement: Data_Sheet_1.pdf [file Data_Sheet_1.pdf]

## Supplementary information

### **Antibiotic resistance and pathogenicity assessment of various *Gardnerella* sp. strains in local China**

Running title: **Antibiotic resistance and pathogenicity of *Gardnerella***

Kundi Zhang<sup>a</sup>, Mengyao Lu<sup>a</sup>, Xiaoxuan Zhu<sup>a</sup>, Kun Wang<sup>b</sup>, Xuemei Jie<sup>b</sup>, Tan Li<sup>c</sup>, ,  
Hongjie Dong<sup>a</sup>, Rongguo Li<sup>b</sup>, Fengyu Zhang<sup>a,\*</sup>, Lichuan Gu<sup>a,\*</sup>

State Key Laboratory of Microbial Technology, Shandong University, Qingdao 266237, Shandong, China <sup>a</sup>; Jinan Key Laboratory of Female Reproductive Tract Infection, Jinan Genital Tract Microecological Clinical Laboratory, Jinan Maternity and Child Care Hospital Affiliated to Shandong First Medical University, Jinan 250001, China<sup>b</sup>; Faculty of Health Sciences, Cumming School of Medicine, 3330 Hospital Dr NW, Calgary, AB T2N 4N1, Canada<sup>c</sup>

\*Correspondence to:

Dr. Fengyu Zhang, State Key Laboratory of Microbial Technology, Shandong University, Qingdao 266237, Shandong, China, [zfengyu@mail.sdu.edu.cn](mailto:zfengyu@mail.sdu.edu.cn).

Prof Lichuan Gu, State Key Laboratory of Microbial Technology, Shandong University, Qingdao 266237, Shandong, China, [lengu@sdu.edu.cn](mailto:lengu@sdu.edu.cn).

## **I. Supplemental Figures**

## **II. Supplemental Tables**

## I. Supplemental Figures

Figure S1. Phylogenomic tree of *Gardnerella* strains. A proteomic tree was constructed based on the genome sequences of 21 *Gardnerella* strains. The tree was built by the neighbor-joining method, and bootstrap value above 90 are shown at node points, based on 1,000 replicates.

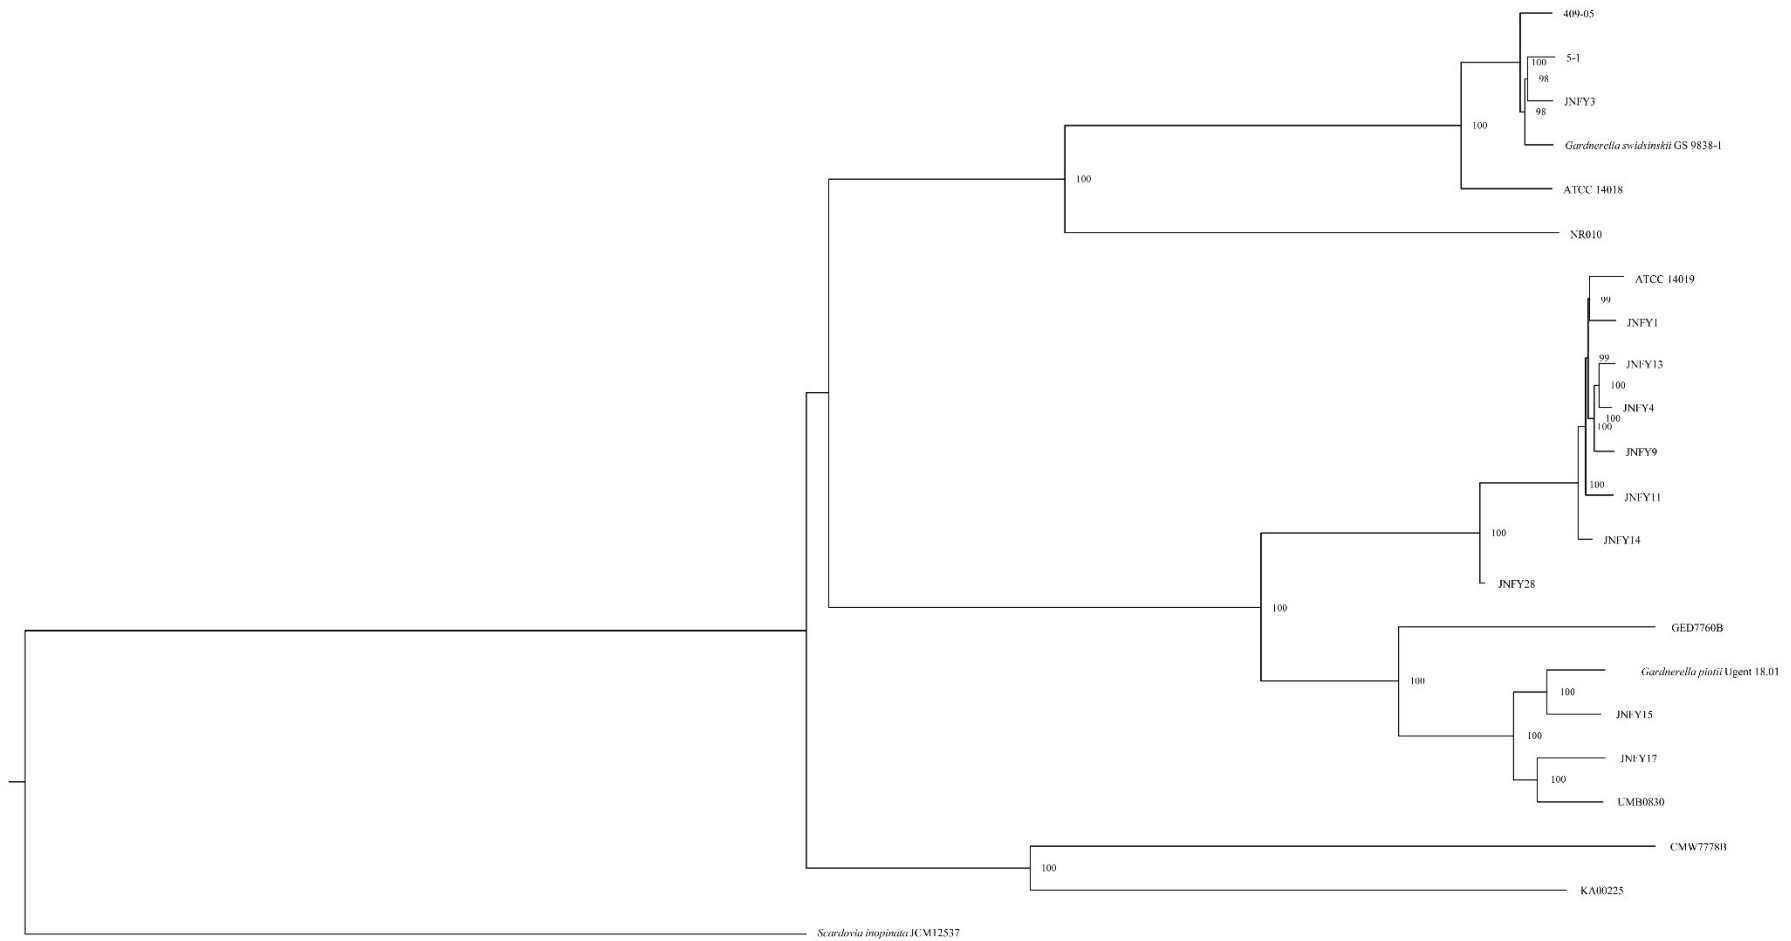

0.03



## II. Supplemental Tables

Table S1. PCR primers used in this study.

| Primers  | Sequence(5'-3')           |
|----------|---------------------------|
| 16S27F   | GAGTTTGATCCTGGCTCAG       |
| 16S1492R | AGAAAGGAGGTGATCCAGCC      |
| cpn60F   | ATGGCAAAGATTATTGCCTATGAAG |
| cpn60R   | GCATTCTGTAGAGCAGAACGAGT   |
| vlyF     | GTACGATTCTGCAAGCGCACAAAGC |
| vlyR     | CCTTCCCAAGCGGAGAACGC      |
| sldF     | ATGGAACGTCGTTCAACGAAG     |
| sldR     | GATACGCGTTTTATGTCTCTTGC   |

Table S2. Carbohydrate transport and metabolism genes comparison of the *Gardnerella* strains.

| Gene | Annotation                                                                       | ATCC<br>14019 | JNFY1 | JNFY3 | JNFY4 | JNFY9 | JNFY11 | JNFY13 | JNFY14 | JNFY15 | JNFY17 | JNFY28 |
|------|----------------------------------------------------------------------------------|---------------|-------|-------|-------|-------|--------|--------|--------|--------|--------|--------|
| AfuC | Alpha-L-fucosidase                                                               | 1             | 1     | 0     | 1     | 1     | 1      | 1      | 1      | 0      | 0      | 0      |
| AraD | Ribulose-5-phosphate<br>4-epimerase/Fuculose-1-phosphate<br>aldolase             | 0             | 1     | 0     | 1     | 1     | 1      | 1      | 1      | 0      | 0      | 0      |
| FucP | Fucose permease                                                                  | 0             | 1     | 0     | 1     | 1     | 1      | 1      | 1      | 0      | 0      | 0      |
| GalM | Galactose mutarotase or related<br>enzyme                                        | 0             | 1     | 0     | 1     | 1     | 1      | 1      | 1      | 0      | 0      | 0      |
| GalT | Galactose-1-phosphate<br>uridylyltransferase                                     | 2             | 1     | 0     | 1     | 1     | 1      | 1      | 1      | 0      | 0      | 0      |
| LacZ | Beta-galactosidase/beta-glucuronidase                                            | 2             | 2     | 0     | 2     | 2     | 2      | 2      | 2      | 0      | 0      | 0      |
| MglA | ABC-type sugar transport system,<br>ATPase component                             | 0             | 4     | 1     | 4     | 4     | 4      | 4      | 4      | 0      | 0      | 0      |
| XylB | Sugar (pentulose or hexulose) kinase                                             | 0             | 2     | 0     | 2     | 2     | 2      | 2      | 2      | 0      | 0      | 0      |
| XylF | ABC-type xylose transport system,<br>periplasmic component                       | 0             | 1     | 0     | 2     | 2     | 1      | 2      | 2      | 0      | 0      | 0      |
| NagC | Sugar kinase of the NBD/HSP70<br>family, may contain an N-terminal<br>HTH domain | 0             | 7     | 1     | 8     | 7     | 8      | 8      | 7      | 4      | 2      | 2      |
| UgpA | ABC-type sugar transport system,<br>permease component                           | 8             | 8     | 3     | 9     | 8     | 10     | 9      | 8      | 3      | 4      | 4      |
| UgpB | ABC-type glycerol-3-phosphate                                                    | 3             | 8     | 4     | 9     | 8     | 10     | 9      | 8      | 3      | 4      | 4      |

---

|      |                              |                                       |   |   |   |   |   |   |   |   |   |   |   |
|------|------------------------------|---------------------------------------|---|---|---|---|---|---|---|---|---|---|---|
|      | transport component          | system, periplasmic                   |   |   |   |   |   |   |   |   |   |   |   |
| UgpE | ABC-type transport component | glycerol-3-phosphate system, permease | 3 | 7 | 2 | 8 | 7 | 9 | 8 | 7 | 2 | 3 | 3 |

---



Table S3. Common virulence factors of the ten *Gardnerella* epidemic strains.

| Virulence factor                                                    | Related gene     | Product                                                |
|---------------------------------------------------------------------|------------------|--------------------------------------------------------|
| Adhesion                                                            |                  |                                                        |
| ABC transporter ATP-binding protein AatC                            | <i>aatC</i>      | ABC transporter                                        |
| Polyphosphate kinase(type IV pili)                                  | <i>ppK</i>       | polyphosphate kinase 1                                 |
| Surface-anchored pilus proteins                                     | <i>sapD</i>      | actinobacterial surface-anchored protein domain        |
| Elongation factor Tu                                                | <i>tuf</i>       | small GTP-binding protein domain                       |
| Trigger factor                                                      | <i>tig/ropA</i>  | trigger factor                                         |
| Immunogenic lipoprotein A(IlpA)                                     | <i>IlpA</i>      | NLPA lipoprotein                                       |
| Listeria adhesion protein                                           | <i>lap</i>       | Aldehyde dehydrogenase family                          |
| Iron uptake                                                         |                  |                                                        |
| Iron related(ABC transporter)                                       | <i>fbpC</i>      | ABC transporter                                        |
| Putative iron transport system ATP-binding protein                  | <i>ciuD</i>      | phosphate ABC transporter, ATP-binding protein         |
| ABC transporter ATP-binding protein                                 | <i>irtB</i>      | FeS assembly ATPase SufC                               |
| Ferrous iron transport                                              | <i>sitC</i>      | anchored repeat-type ABC transporter, permease subunit |
| Transcriptional repressor of iron-responsive genes                  | <i>fur</i>       | Ferric uptake regulator family                         |
| Iron(III)                                                           | <i>fbpC,hitC</i> | ABC transporter                                        |
| Secretion system                                                    |                  |                                                        |
| preprotein translocase subunit SecA<br>(Accessory secretion factor) | <i>secA2</i>     | preprotein translocase, SecA subunit                   |
| type III secretion system ATPase(T3SS)                              | <i>DVUA0119</i>  | ATP synthase F1, alpha subunit                         |
| type III secretion system ATPase(T3SS)                              | <i>ssaN</i>      | transcription termination factor Rho                   |
| Dot/Icm type IV secretion system effector                           | <i>lirB</i>      | Cyclophilin type peptidyl-prolyl cis-trans             |

|                                                                                                        |                                  |                                                                            |
|--------------------------------------------------------------------------------------------------------|----------------------------------|----------------------------------------------------------------------------|
| LirB(Dot/Icm)<br>T6SS-II(CVF861)                                                                       | protein disaggregation chaperone | isomerase<br>ATP-dependent chaperone protein ClpB                          |
| Invasion                                                                                               |                                  |                                                                            |
| Lipoprotein promoting entry protein<br>P60 extracellular protein, invasion associated<br>protein Iap   | <i>lpeA</i><br><i>iap/cwhA</i>   | actinobacterial surface-anchored protein domain<br>NlpC/P60 family         |
| Stress protein                                                                                         |                                  |                                                                            |
| endopeptidase Clp ATP-binding chain C(Clpc)<br>ATP-dependent Clp protease proteolytic<br>subunit(Clpp) | <i>clpC</i><br><i>clpP</i>       | ATPase family associated with various cellular<br>Clp protease             |
| Antibiotic resistance                                                                                  |                                  |                                                                            |
| daunorubicin resistance ABC transporter<br>ATP-binding subunit                                         | <i>ddrA</i>                      | ABC transporter                                                            |
| Regulation of virulence-associated genes                                                               |                                  |                                                                            |
| ppGpp synthetase, RelA/SpoT family<br>S-ribosylhomocysteinase(Autoinducer-2)                           | <i>relA</i><br><i>luxS</i>       | RelA/SpoT family protein<br>S-Ribosylhomocysteinase (LuxS)                 |
| two-component system response<br>regulator(DevR/S)                                                     | <i>devR/dosR</i>                 | Response regulator receiver domain                                         |
| membrane-bound transcriptional regulator LytR<br>(Polysaccharide capsule)                              | <i>lytR</i>                      | cell envelope-related function transcriptional<br>attenuator common domain |

Table S4. Partially-shared virulence factors of the ten *Gardnerella* epidemic strains.

| Virulence factor                                                           | Related gene          | Product                                     | Strains lacking the gene     |
|----------------------------------------------------------------------------|-----------------------|---------------------------------------------|------------------------------|
| <b>Adhesion</b>                                                            |                       |                                             |                              |
| tight adherence protein A (Flp pili)                                       | <i>tadA</i>           | Type II/IV secretion system protein         | JNFY3, JNFY13, JNFY28        |
| SpaD-type pili                                                             | <i>srtB</i>           | sortase                                     | JNFY28                       |
| Type IV pili response regulator PilH                                       | <i>pilH</i>           | Response regulator receiver domain          | JNFY15, JNFY17               |
| <b>Iron uptake</b>                                                         |                       |                                             |                              |
| phospho-2-dehydro-3-deoxyheptonate aldolase (vulnibactin)                  | <i>VVA1298</i>        | 3-deoxy-7-phosphoheptulonate synthase       | JNFY3                        |
| Haemophilus iron transport locus                                           | <i>hitC, hitC</i>     | ABC transporter                             | JNFY3                        |
| putative iron ABC transport system,                                        | <i>hmuV</i>           | ABC transporter                             | JNFY3                        |
| Yersiniabactin (Ybt)                                                       | <i>ybtQ</i>           | ABC transporter                             | JNFY3, JNFY9, JNFY15, JNFY17 |
| Acinetobactin                                                              | <i>bauE, barA</i>     | ABC transporter                             | JNFY3                        |
| <b>Magnesium uptake</b>                                                    |                       |                                             |                              |
| Magnesium transport ATPase, P-type 2                                       | <i>mgtB</i>           | HAD ATPase, P-type, family IC               | JNFY3                        |
| <b>Secretion system</b>                                                    |                       |                                             |                              |
| ESX-1                                                                      | <i>eccA1</i>          | Holliday junction DNA helicase RuvB         | JNFY3, JNFY15, JNFY17        |
| Coxiella Dot/Icm type IVB secretion system translocated effector (Dot/Icm) | <i>coxH2, coxFIC1</i> | ribosomal-protein-alanine acetyltransferase | JNFY3, JNFY15                |
| Type VII secretion system                                                  | <i>essC</i>           | FtsK/SpoIIIE family                         | JNFY15                       |

|                                                                        |                        |               |                                    |                          |
|------------------------------------------------------------------------|------------------------|---------------|------------------------------------|--------------------------|
| T6SS-III (CVF862)                                                      | periplasmic protein    | sugar-binding | Periplasmic binding protein domain | JNFY15 、 JNFY17 、 JNFY28 |
| <b>Toxin</b>                                                           |                        |               |                                    |                          |
| vaginolysin                                                            | <i>HMPREF0424_0103</i> |               | Thiol-activated cytolysin          | JNFY15                   |
| hemolysin A (Hemolysin)                                                | <i>CLD_2757</i>        |               | TlyA family rRNA methyltransferase | JNFY15、 JNFY17           |
| HlyC/CorC family (Hemolysin)                                           | <i>CLK_2301</i>        |               | CBS domain                         | JNFY3                    |
| hemolysin B (Alpha-hemolysin)                                          | <i>hlyB</i>            |               | ABC transporter                    | JNFY15、 JNFY17           |
| exo-alpha-sialidase (sialidase)                                        | <i>nanJ, nanI</i>      |               | BNR repeat-like domain             | JNFY3                    |
| pyrroline-5-carboxylate reductase (Proline synthesis)                  | <i>proC</i>            |               | pyrroline-5-carboxylate reductase  | JNFY15                   |
| <b>Endotoxin</b>                                                       |                        |               |                                    |                          |
| Fused lipid transporter subunits of ABC superfamily (LOS)              | <i>msbA</i>            |               | ABC transporter                    | JNFY3                    |
| Putative formyl transferase (LPS)                                      | <i>wbmU</i>            |               | methionyl-tRNA formyltransferase   | JNFY15、 JNFY17           |
| <b>Immune vasion</b>                                                   |                        |               |                                    |                          |
| lipooligosaccharide biosynthesis galactosyltransferase, putative (LOS) | <i>CJE1280</i>         |               | Glycosyl transferase family 2      | JNFY3、 JNFY15、 JNFY17    |
| phosphoglucosamine mutase (Exopolysaccharide)                          | <i>mrsA/glmM</i>       |               | phosphoglucosamine mutase          | JNFY3                    |
| exopolysaccharide biosynthesis protein, glycosyl transferase           | <i>eps15</i>           |               | Glycosyl transferases group 1      | JNFY3、 JNFY15、 JNFY17    |

|                                                                            |                  |                                                   |                                   |
|----------------------------------------------------------------------------|------------------|---------------------------------------------------|-----------------------------------|
| (Capsule)                                                                  |                  |                                                   |                                   |
| RgpG (Capsule)                                                             | <i>SGO_1723</i>  | phospho-N-acetylmuramoyl-pentapeptide-transferase | JNFY3、JNFY15、JNFY17               |
| dTDP-4-dehydrorhamnose<br>3,5-epimerase or related enzyme                  | <i>STER_1223</i> | dTDP-4-dehydrorhamnose 3,5-epimerase              | JNFY3                             |
| (Capsule)                                                                  |                  |                                                   |                                   |
| Regulation                                                                 |                  |                                                   |                                   |
| lysozyme                                                                   | <i>lytC</i>      | Glycosyl hydrolases family 25                     | JNFY15 、 JNFY17 、<br>JNFY28       |
| WhiB family transcriptional regulator<br>(WhiB3)                           | <i>whiB3</i>     | Transcription factor WhiB                         | JNFY3                             |
| RNA polymerase sigma factor SigA<br>(Sigma A)                              | <i>sigA/rpoV</i> | RNA polymerase sigma factor RpoD                  | JNFY15、JNFY17                     |
| DNA-binding response regulator<br>PhoP (PhoP/R)                            | <i>phoP</i>      | Response regulator receiver domain                | JNFY3                             |
| two-component system response<br>phosphate sensor kinase, PhoR<br>(PhoP/R) | <i>phoR</i>      | His Kinase A (phospho-acceptor) domain            | JNFY3 、 JNFY13 、<br>JNFY15、JNFY17 |
| two component transcriptional<br>regulator (RegX3)                         | <i>regX3</i>     | Response regulator receiver domain                | JNFY3                             |
| GTP pyrophosphokinase (RelA)                                               | <i>relA</i>      | Region found in RelA / SpoT proteins              | JNFY3                             |

Table S5. Unique virulence factors of strains JNFY3 and JNFY4.

| Strain | Virulence factor                                                       | Related gene    |
|--------|------------------------------------------------------------------------|-----------------|
| JNFY3  | allantoate amidohydrolase (Allantion utilization)                      | <i>allC</i>     |
|        | Allantoinase (Allantion utilization)                                   | <i>allB</i>     |
|        | Glycosyltransferase (Capsule I)                                        | <i>BCAL3234</i> |
|        | putative polysaccharide permease protein (Capsule)                     | <i>SGO_1023</i> |
|        | choline permease (LOS)                                                 | <i>licB</i>     |
|        | aggregation substance (AS)                                             | <i>EF0149</i>   |
| JNFY4  | Bartonella effector protein BepA (VirB/VirD4 type IV secretion system) | <i>bepA</i>     |
